# Supplementary material for: Erianin suppresses constitutive activation of MAPK signaling pathway by inhibition of CRAF and MEK1/2
Source: PubMed Central journal article supplement (PMC9986241; doi:10.1038/s41392-023-01329-3), 2023-03-06

**Fig. 1b**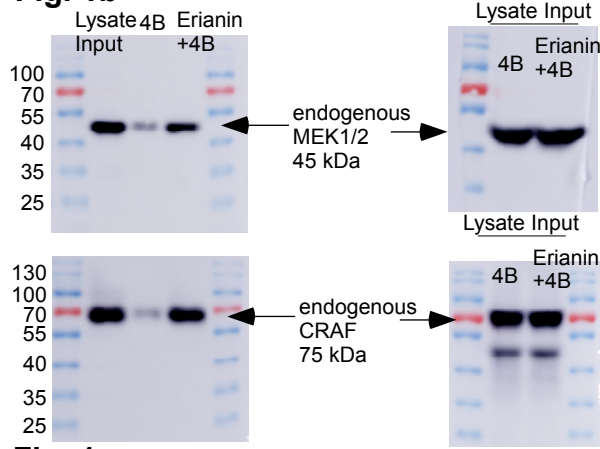**Fig. 1c**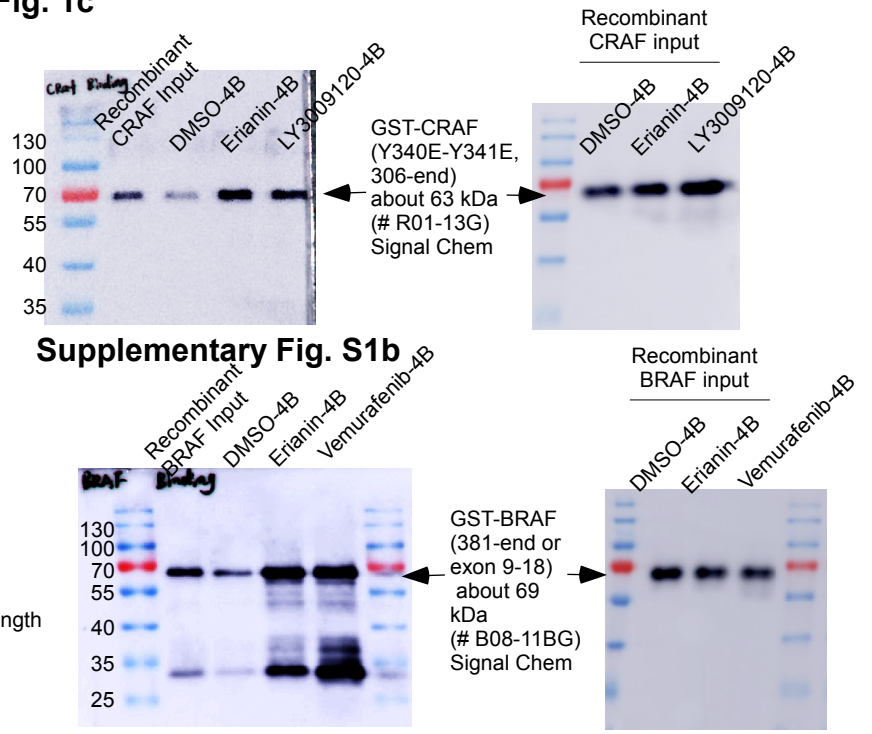**Fig. 1c**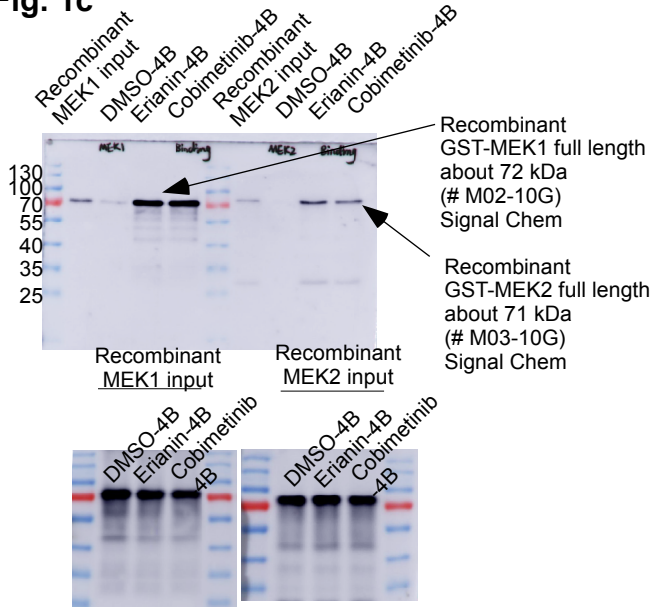**Supplementary Fig. S1a**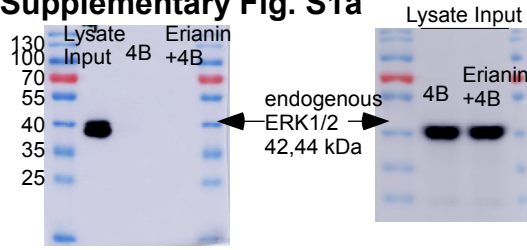**Supplementary Fig. S1a**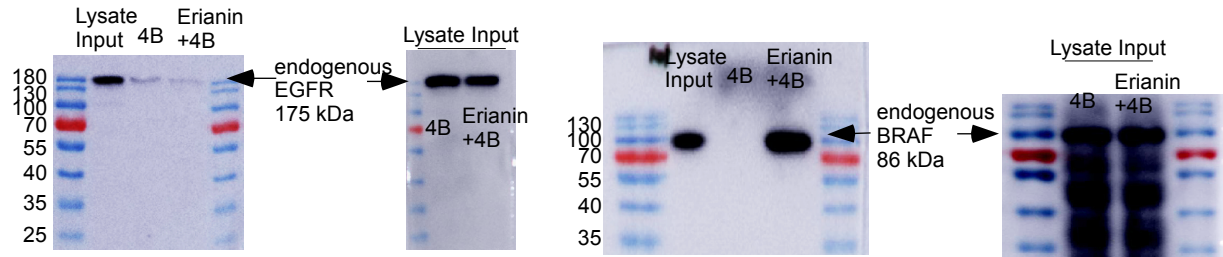**Fig. 1h**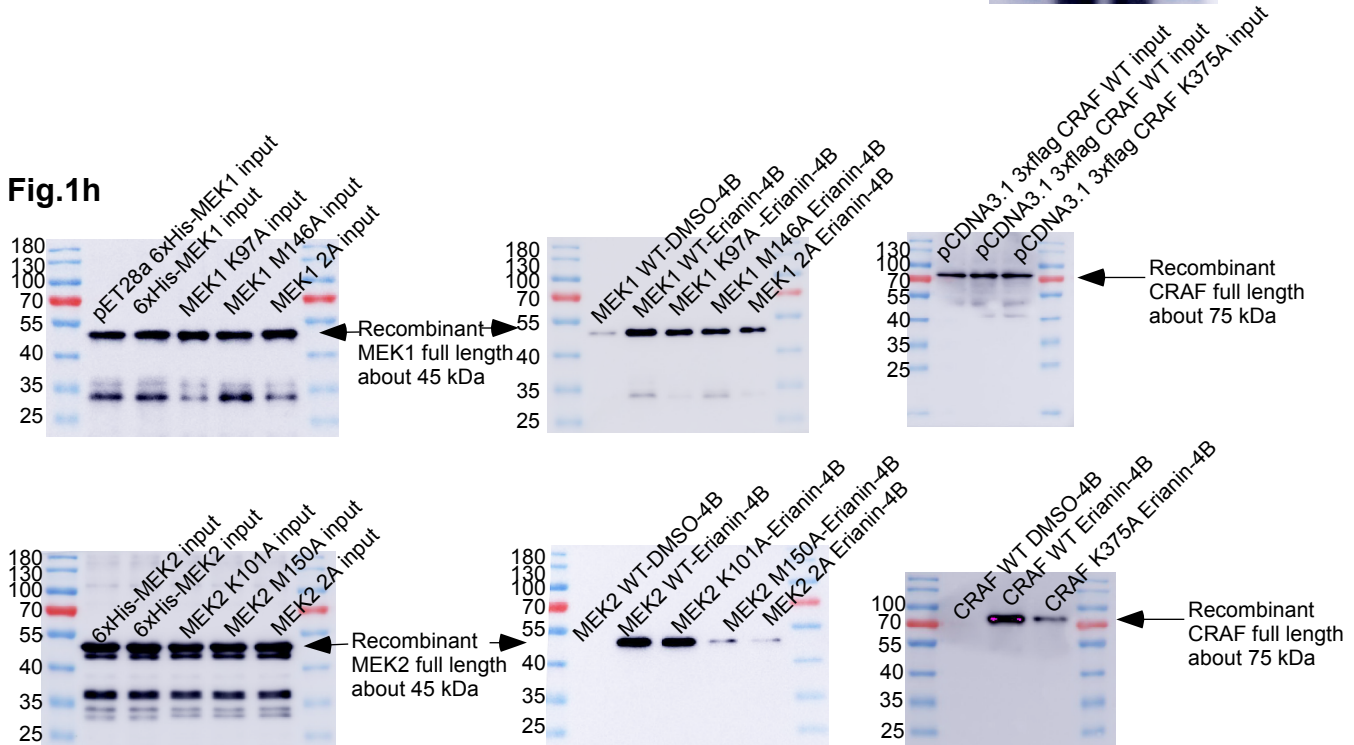

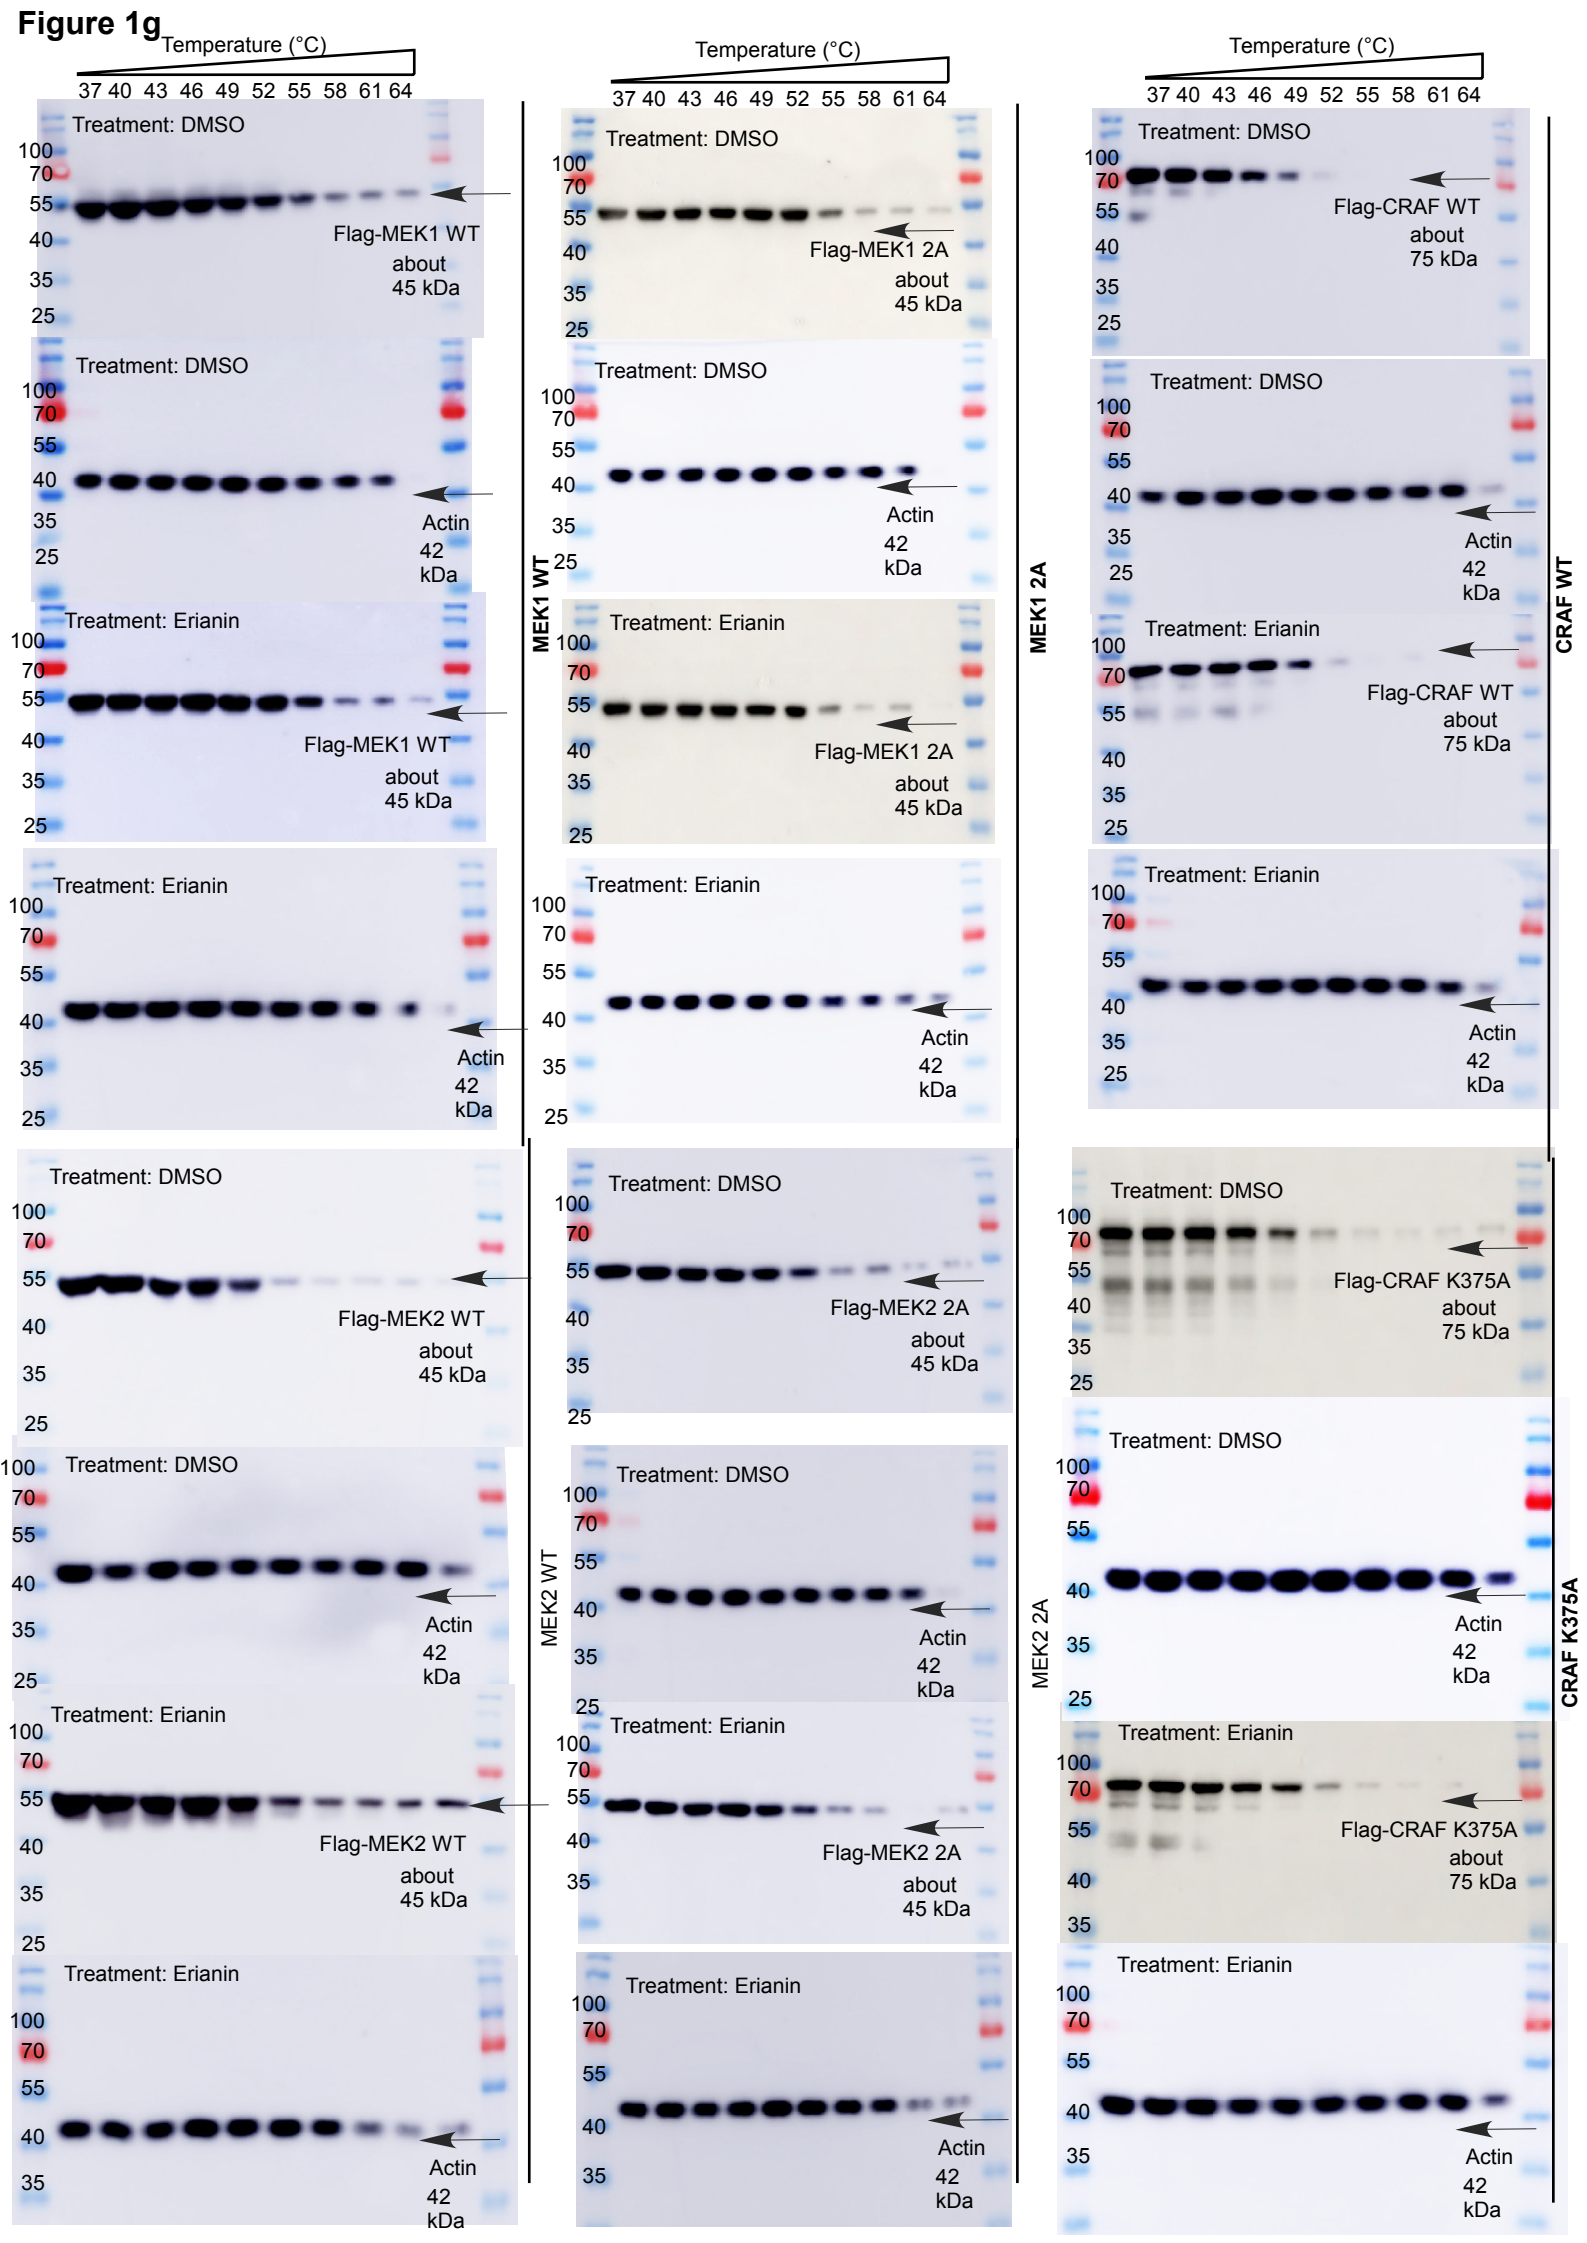

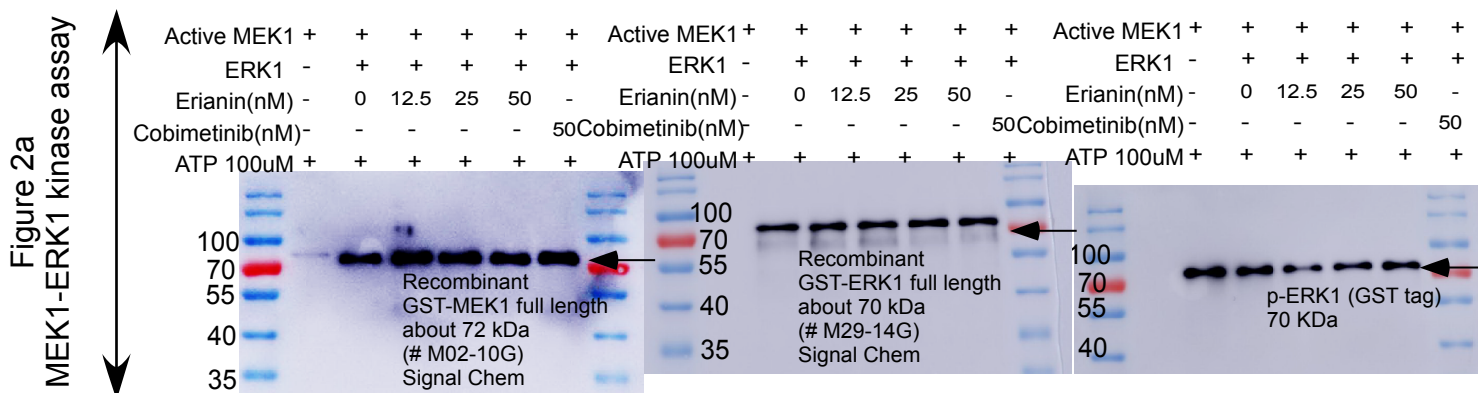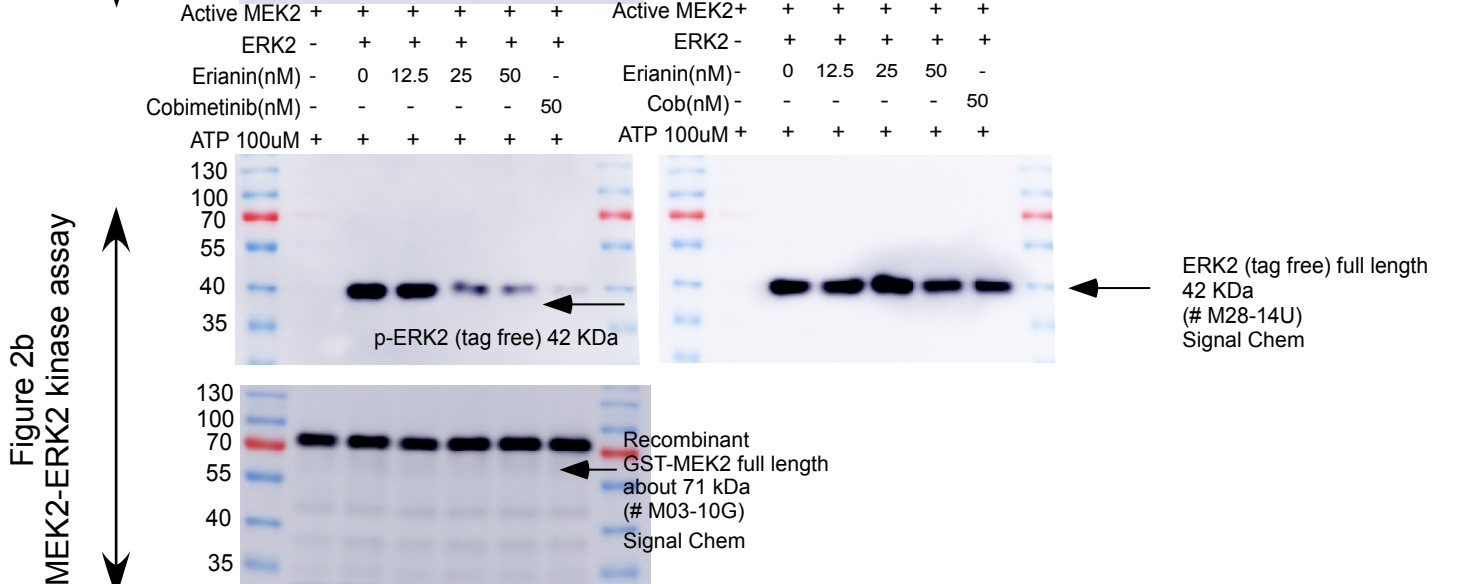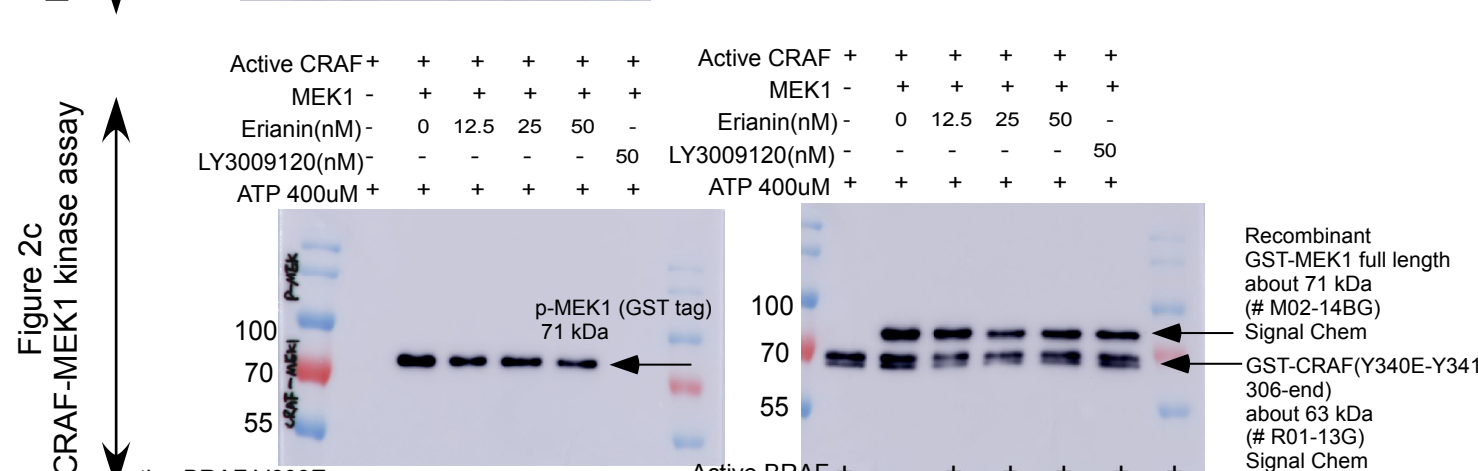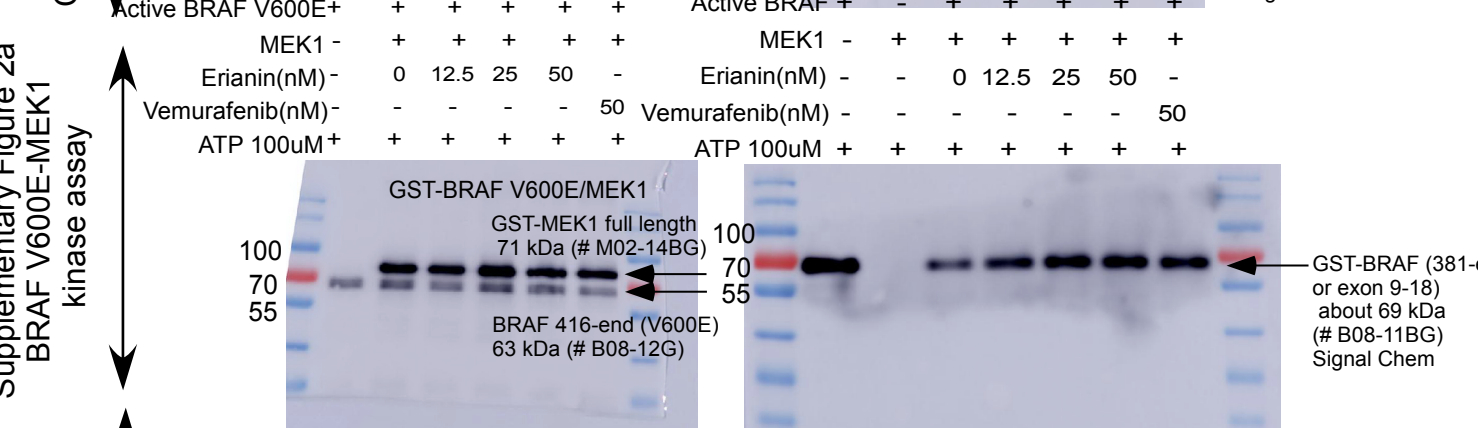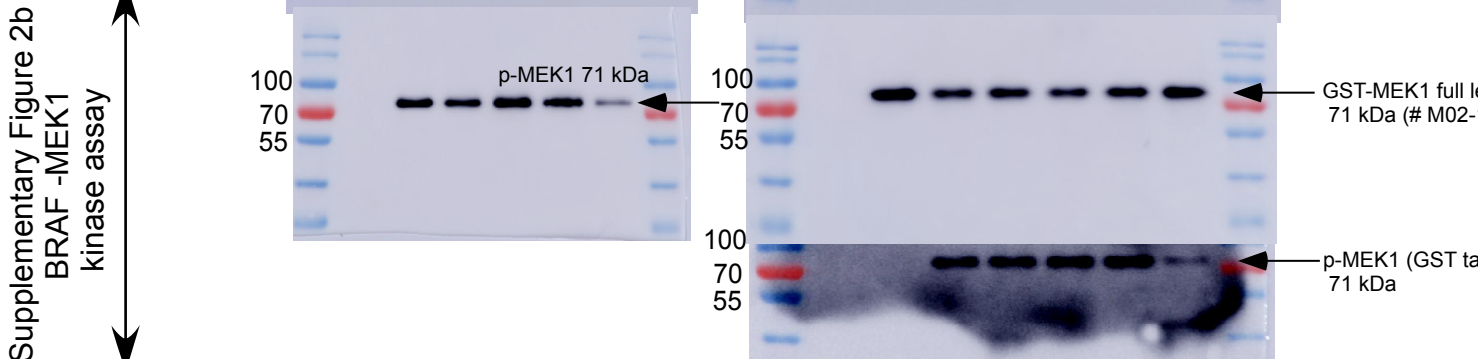

**Figure 2h**

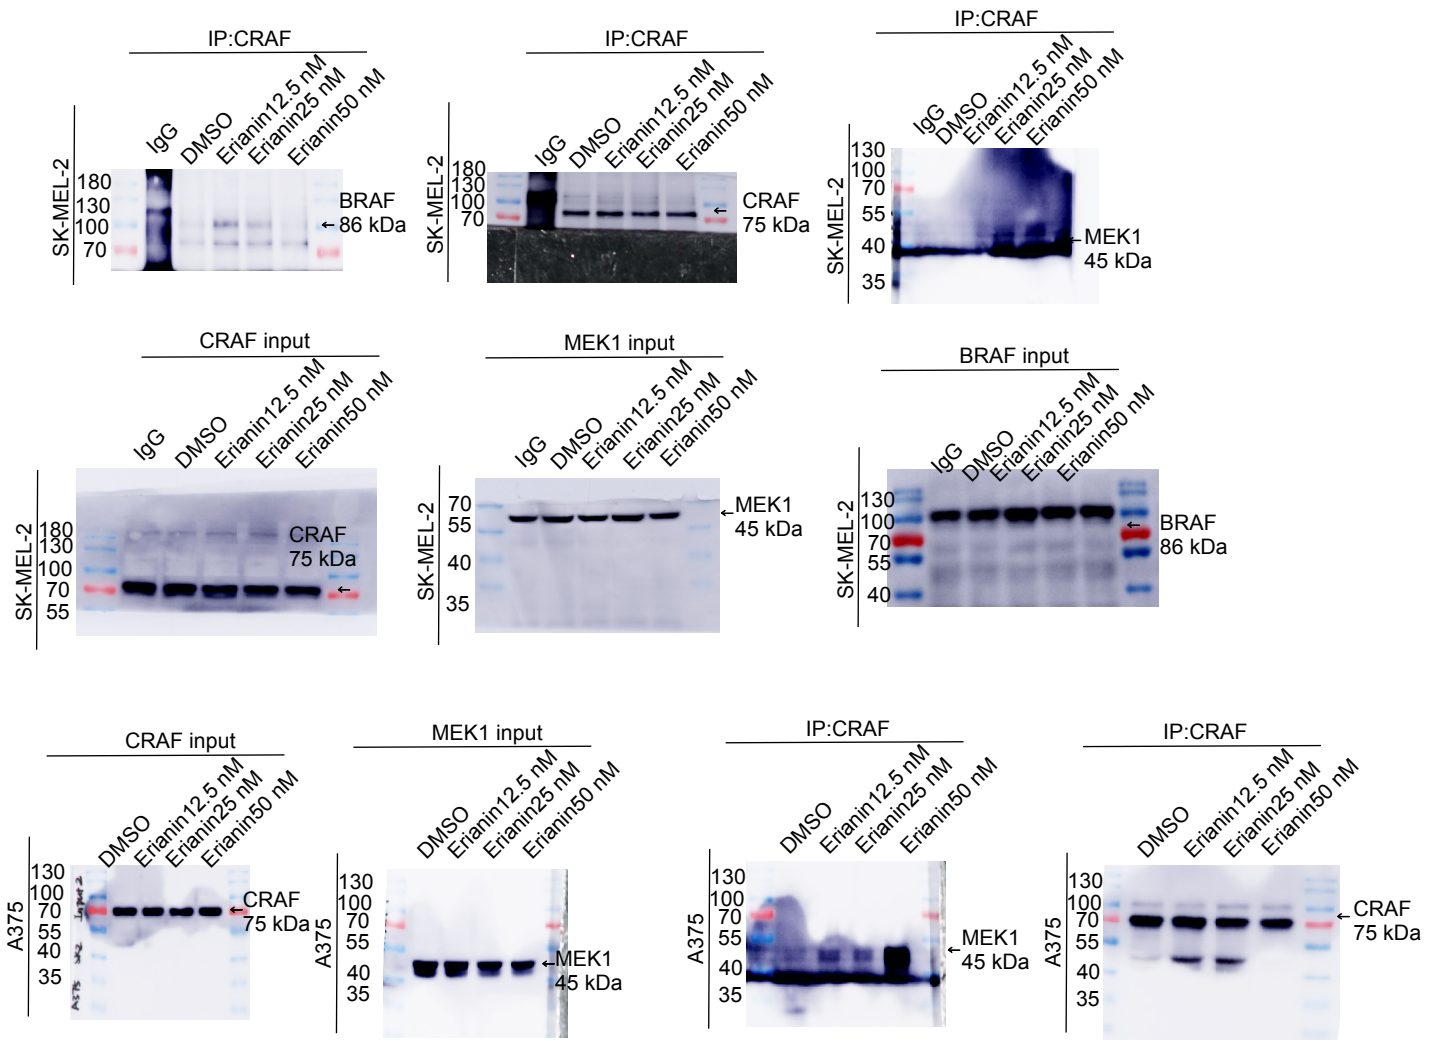

**Figure 2i**

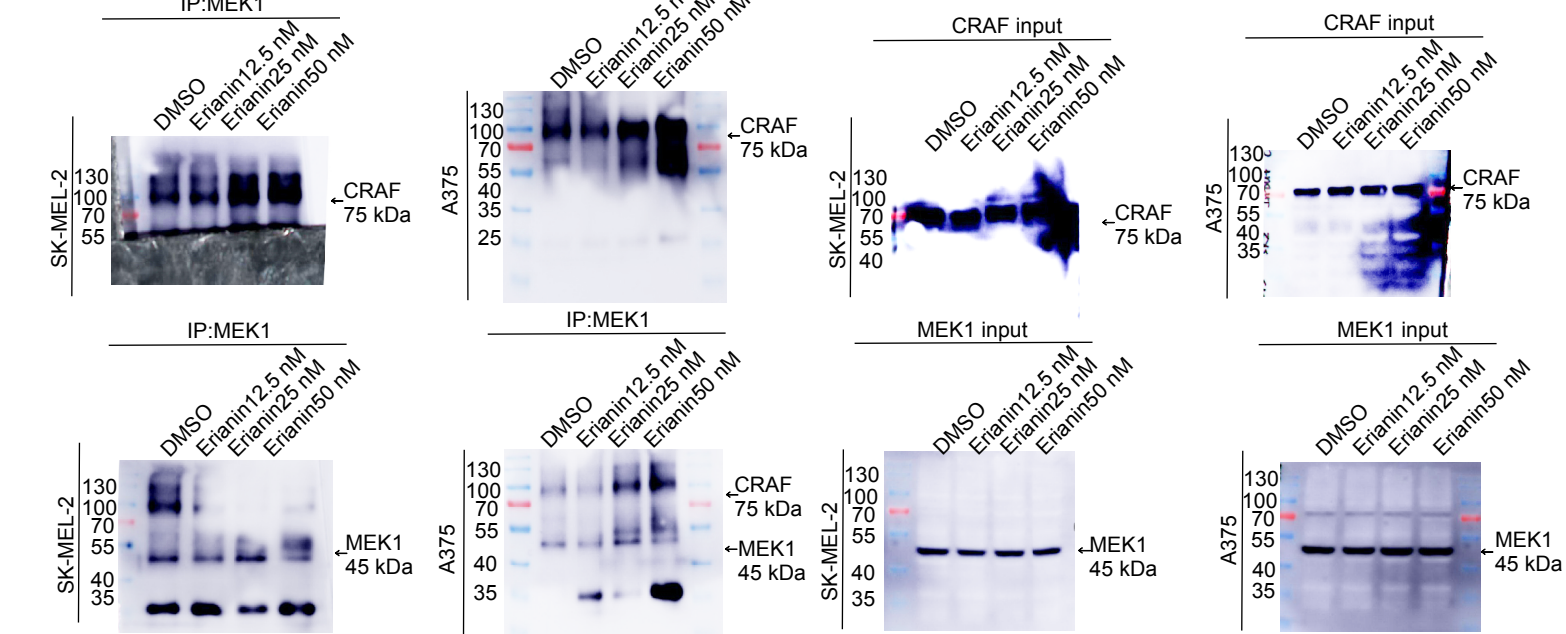

**Figure 2j**

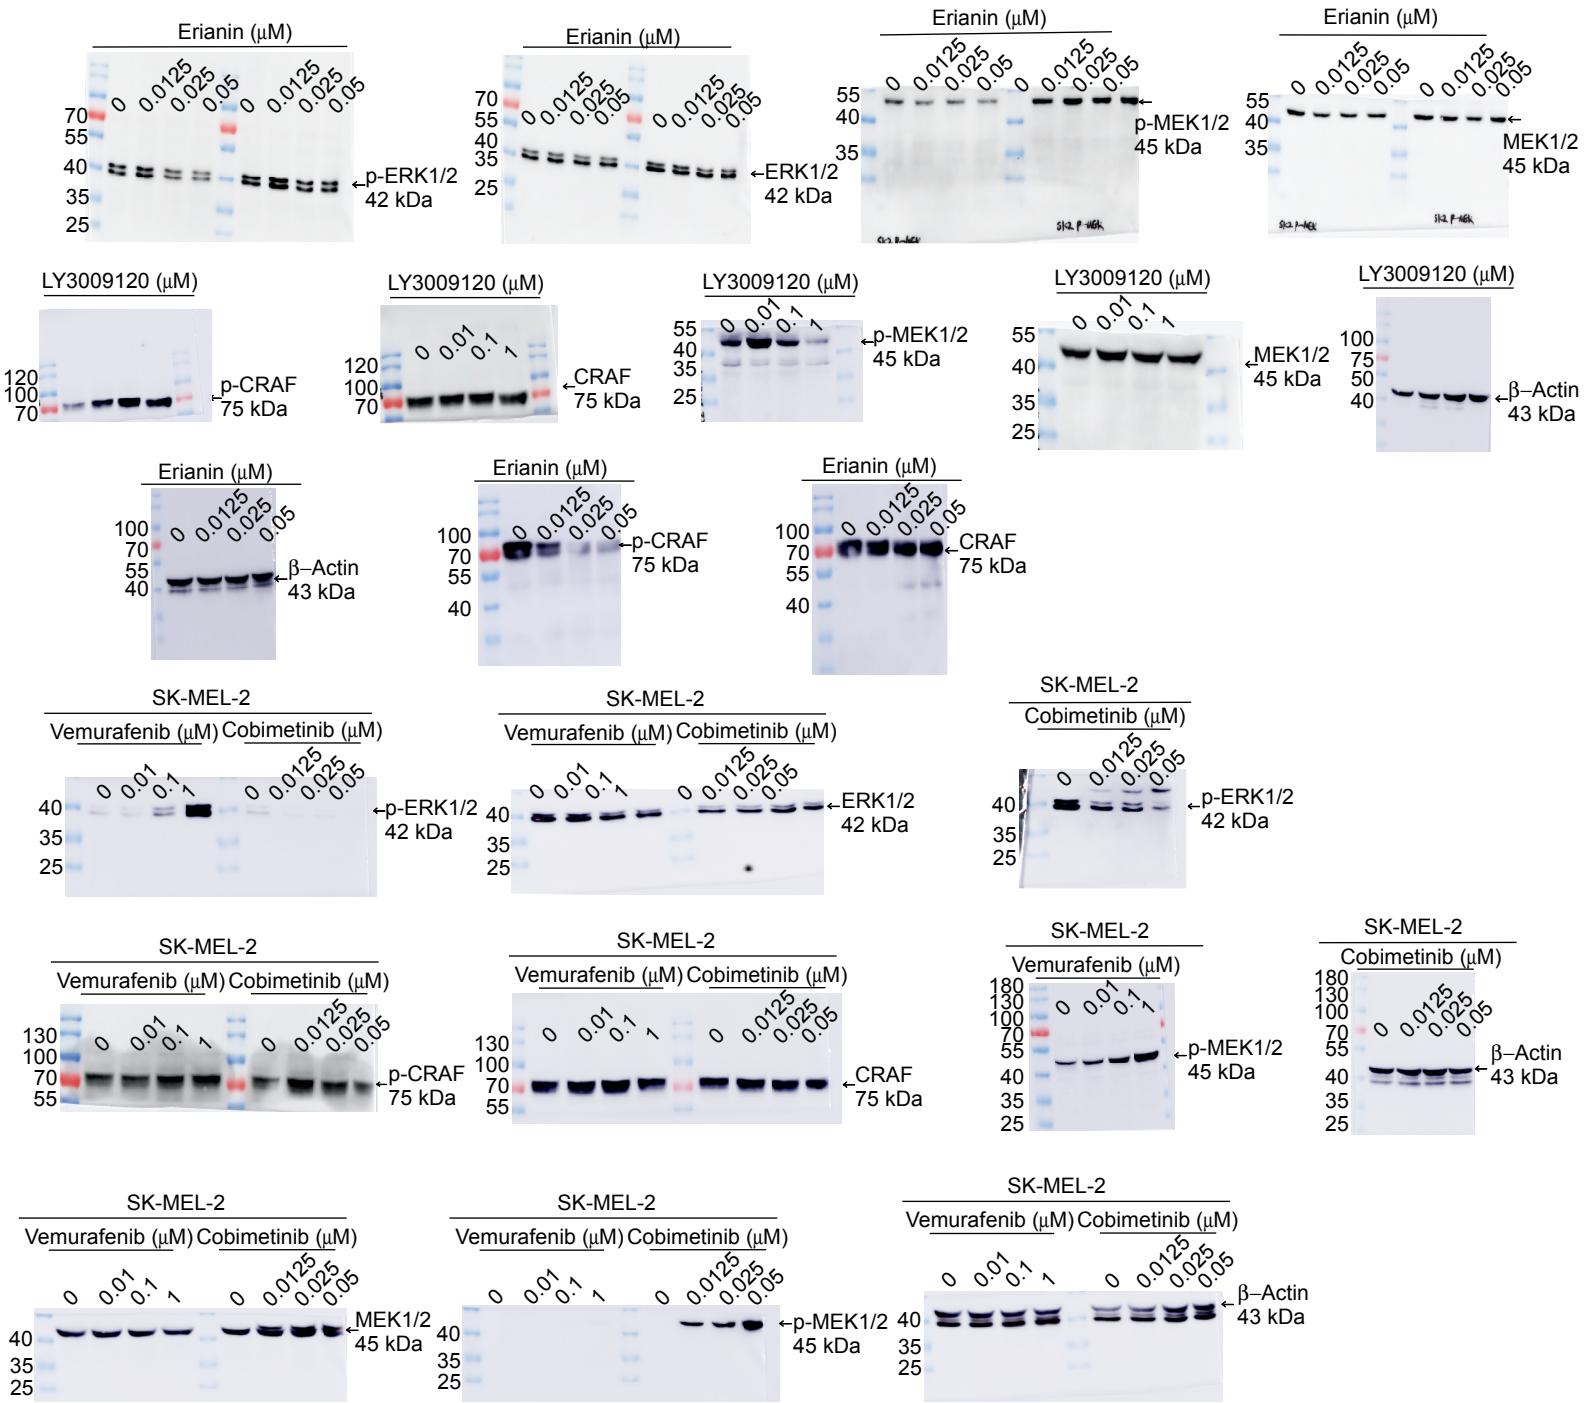

**Figure 2k**

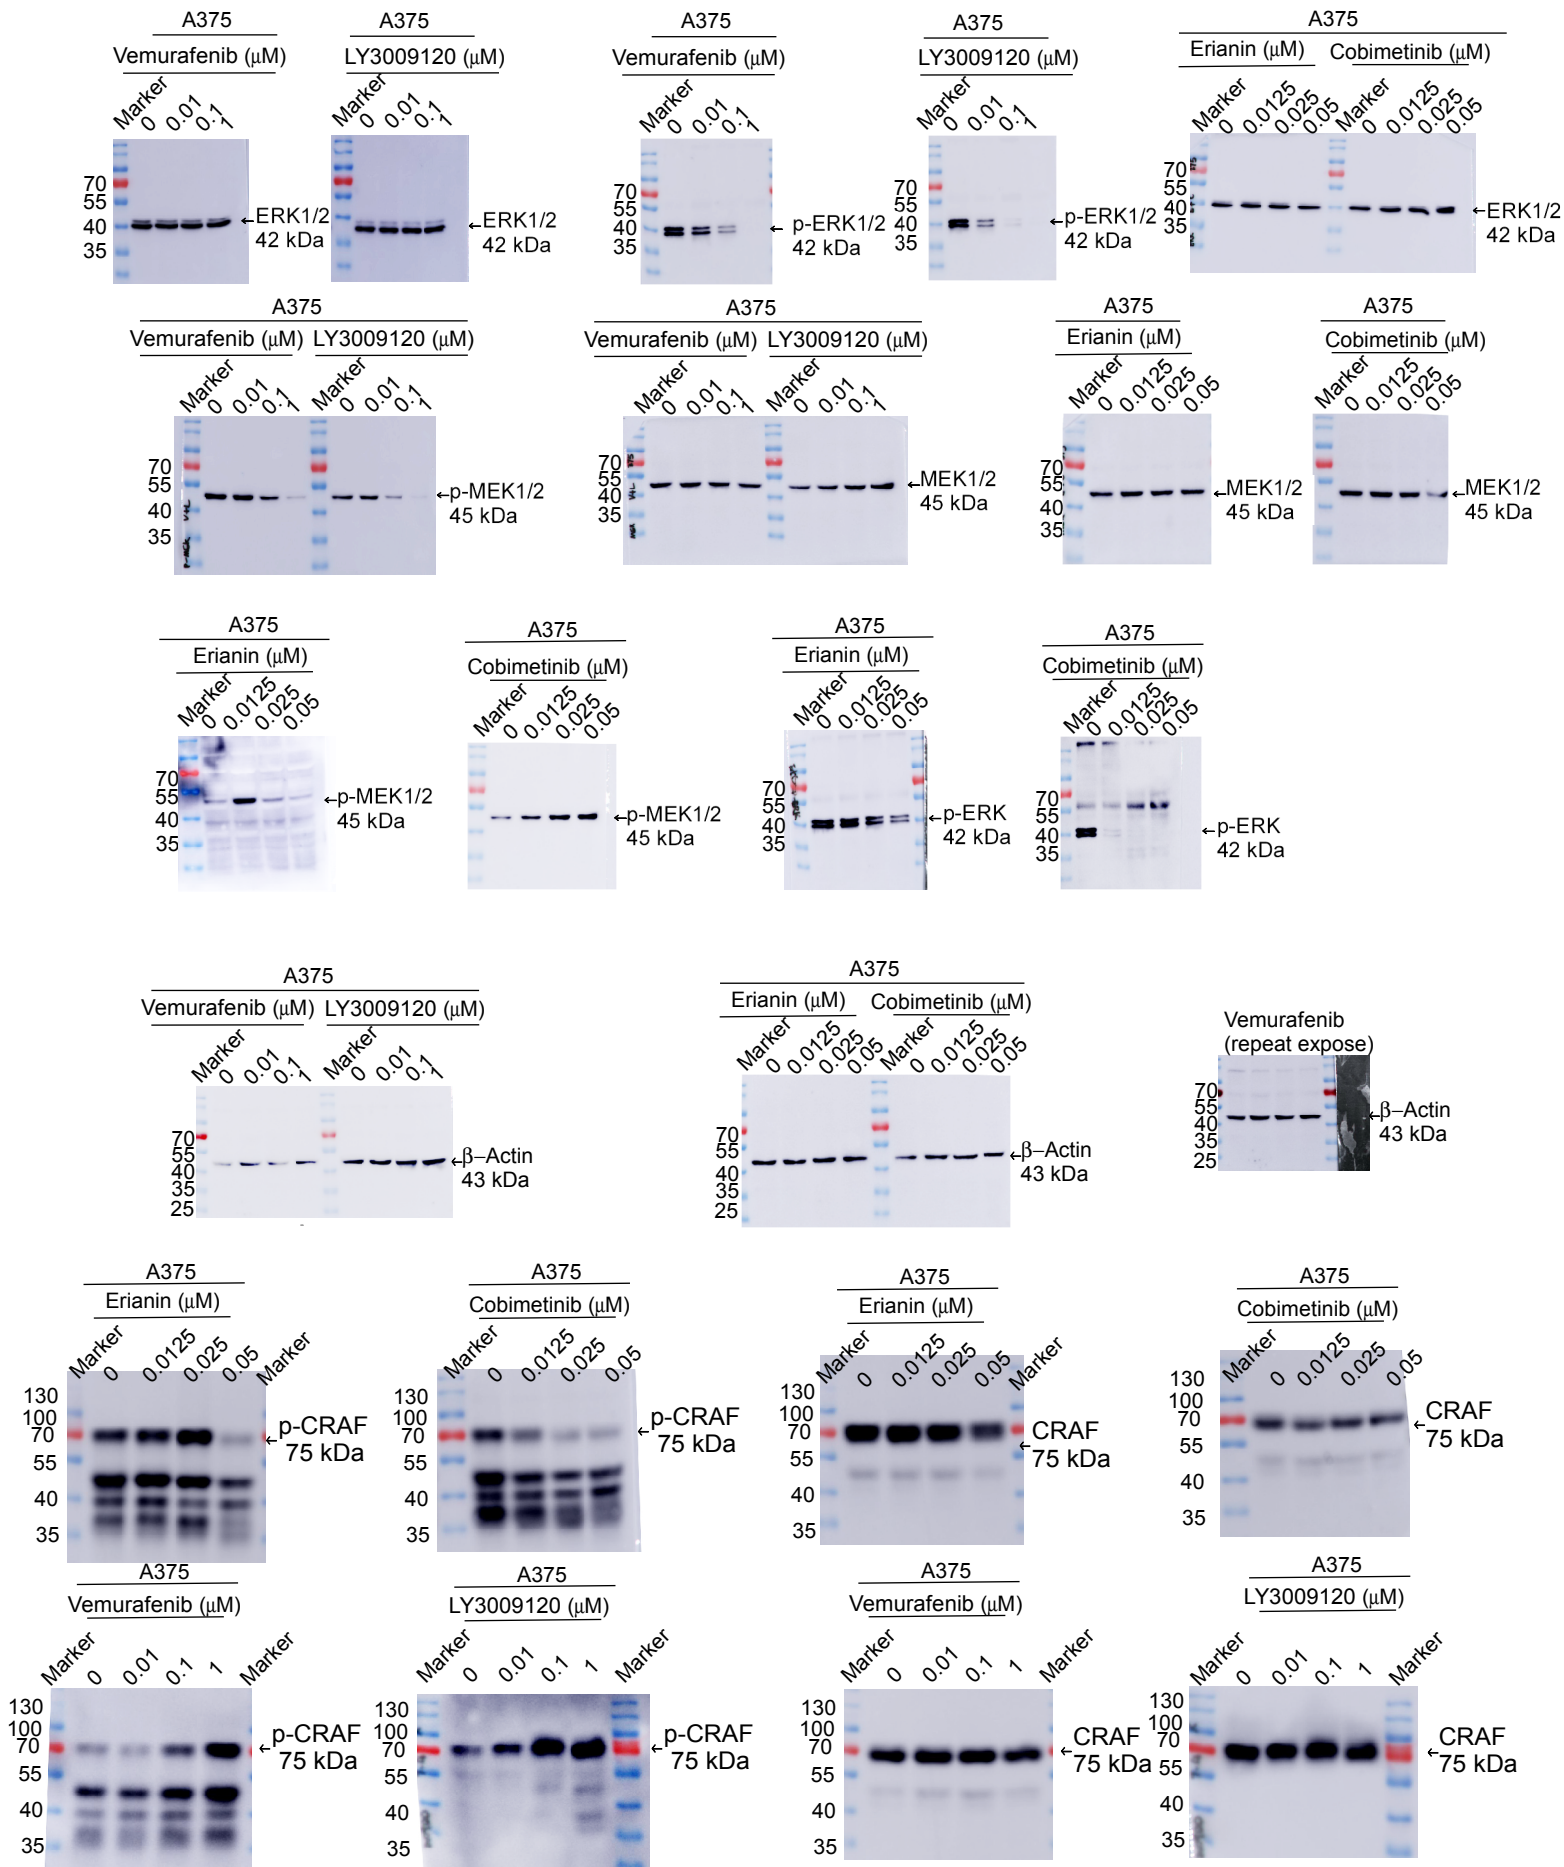

**Figure 2I**

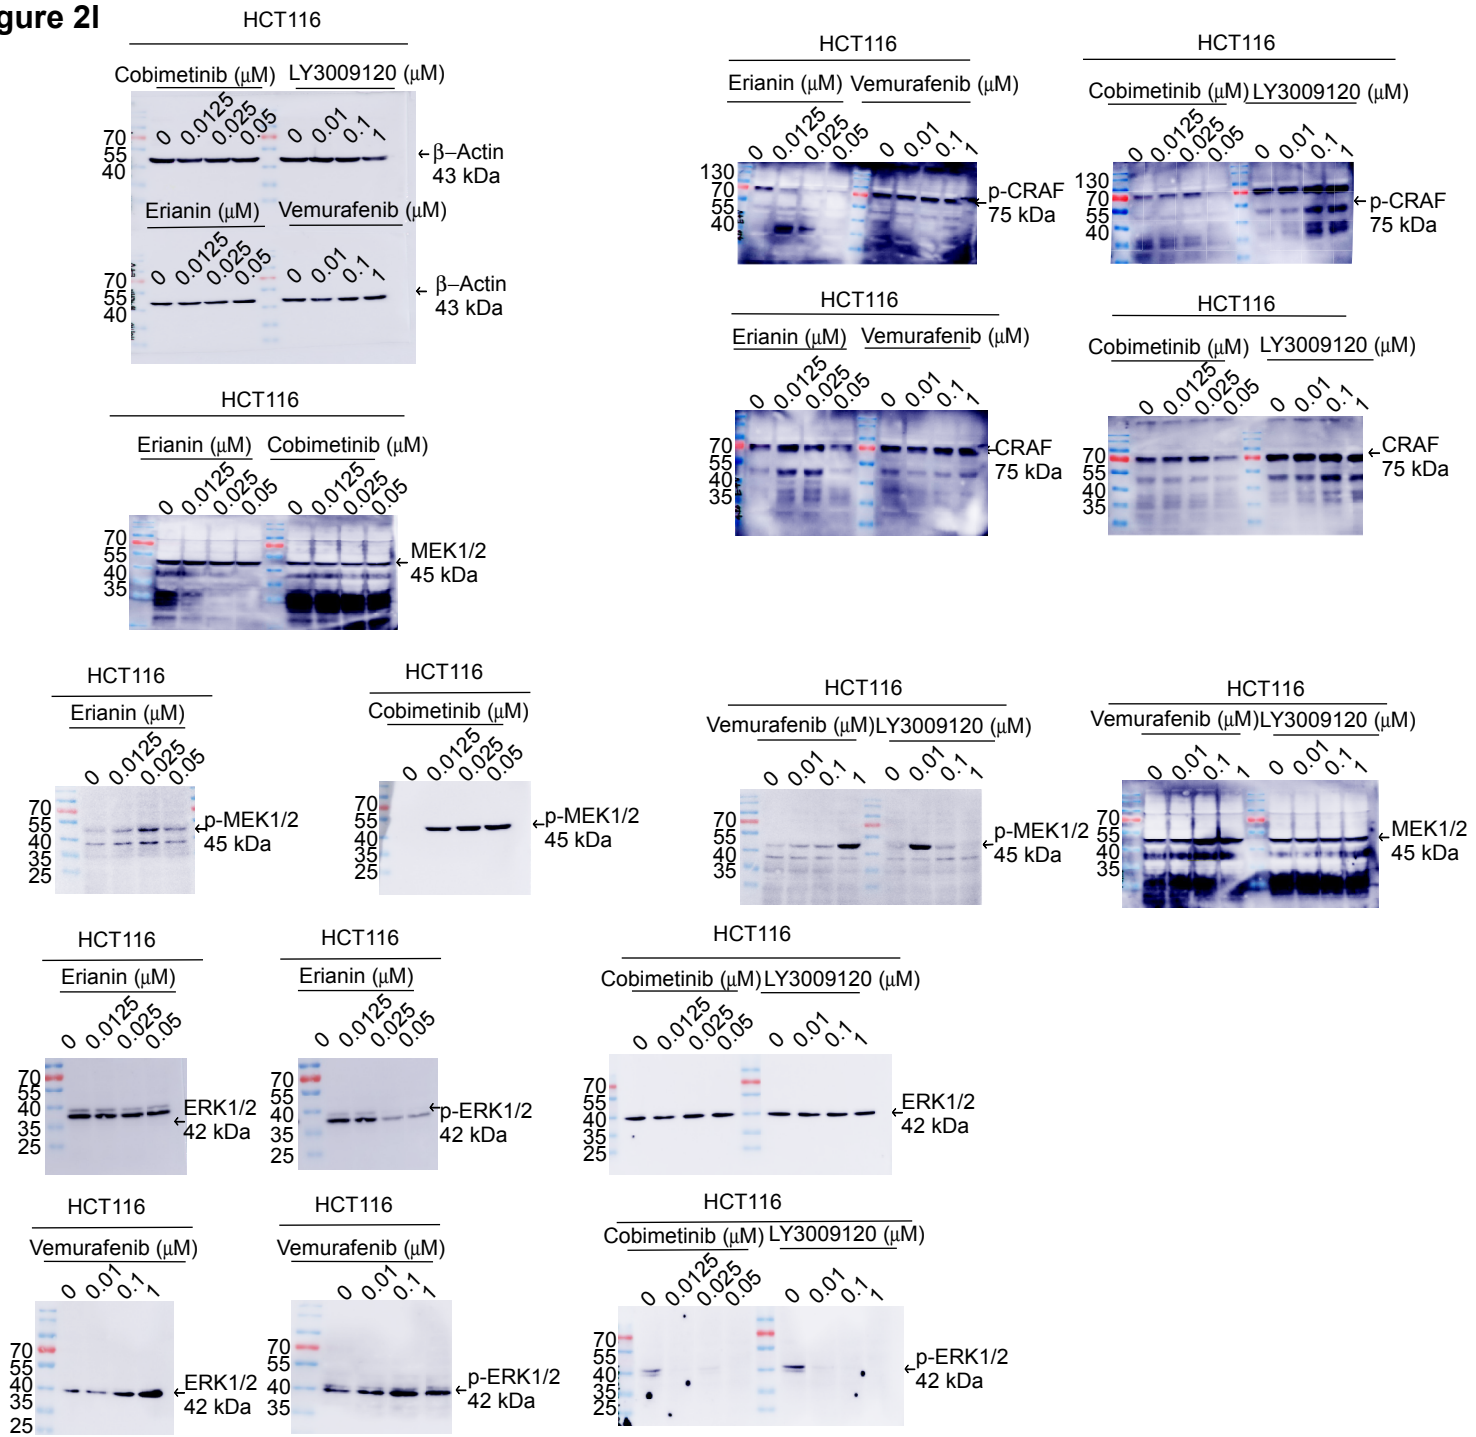

**Figure 4a**

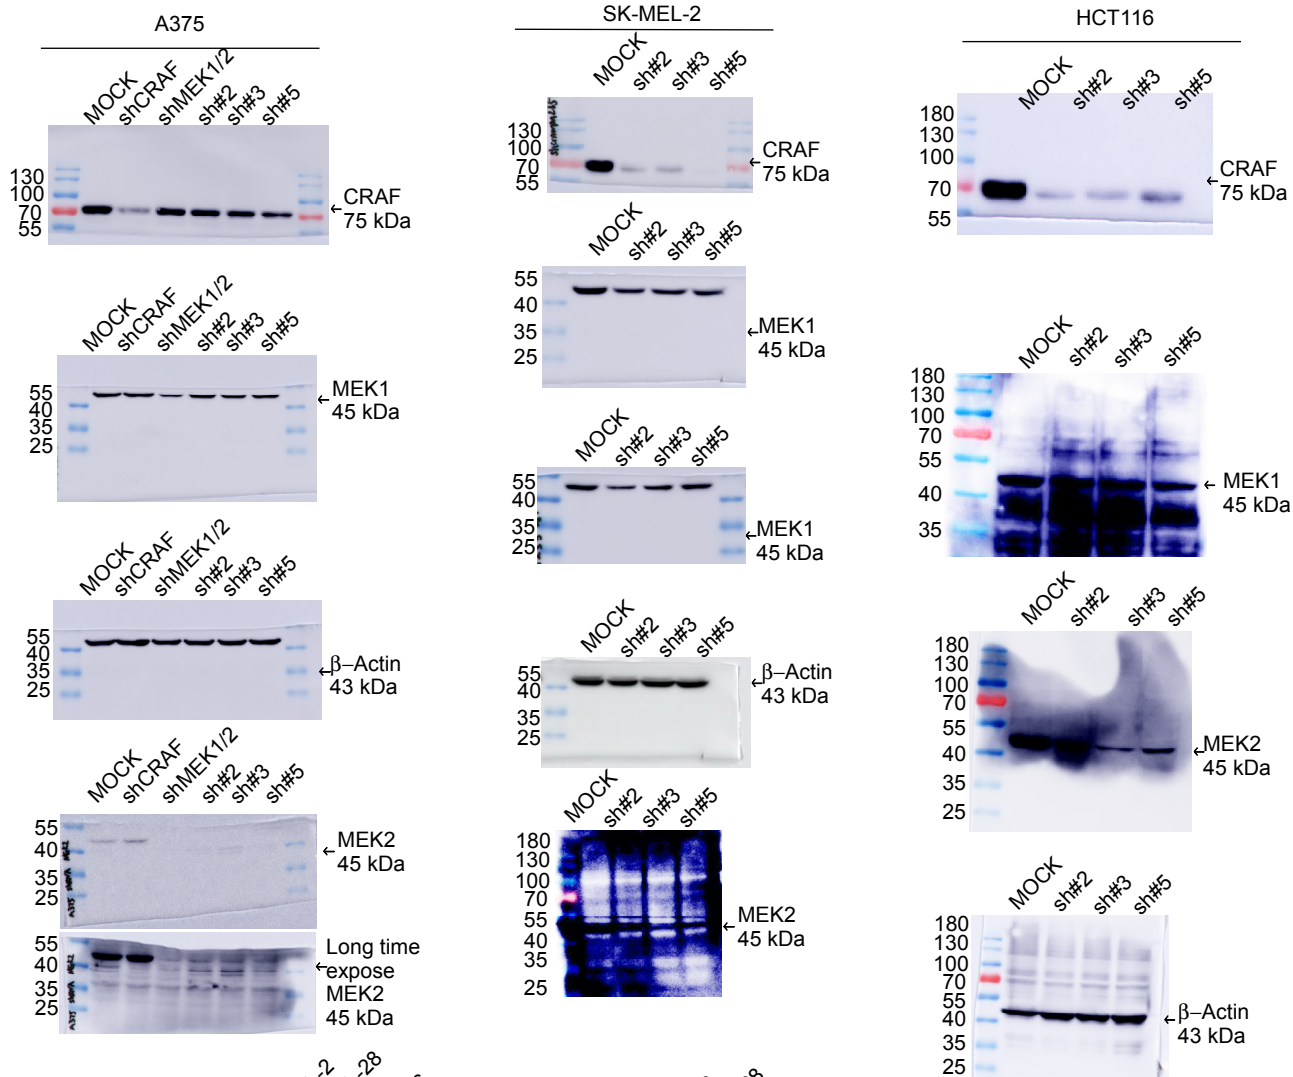

**Figure 4d**

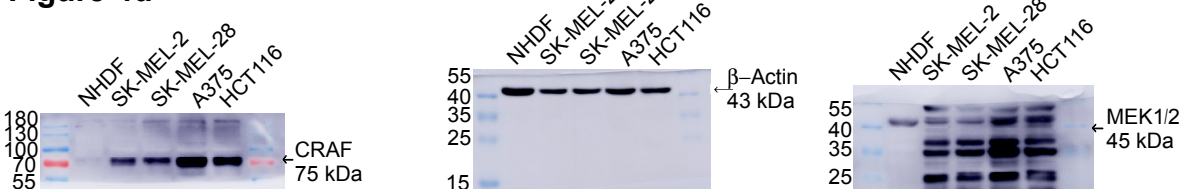

**Figure 4e**

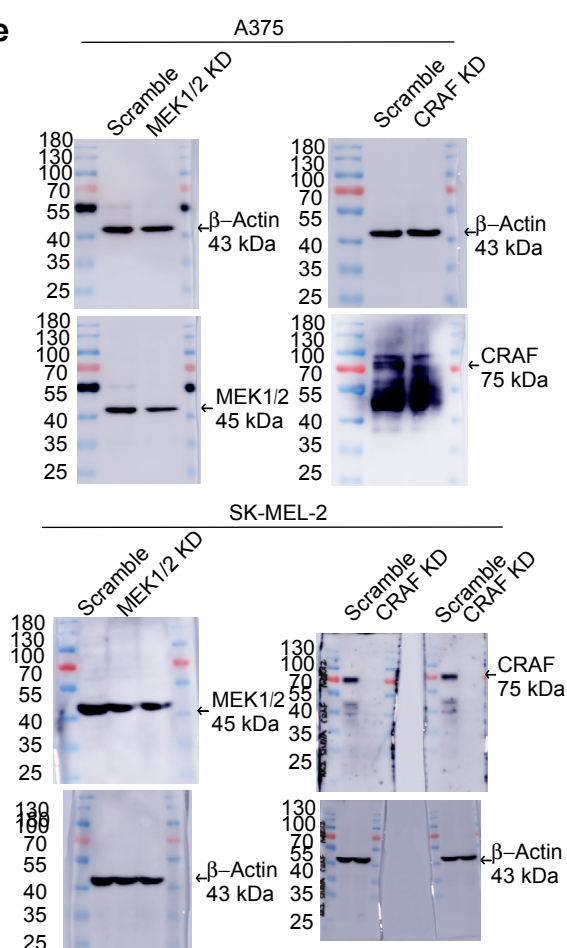

**Figure 4f**

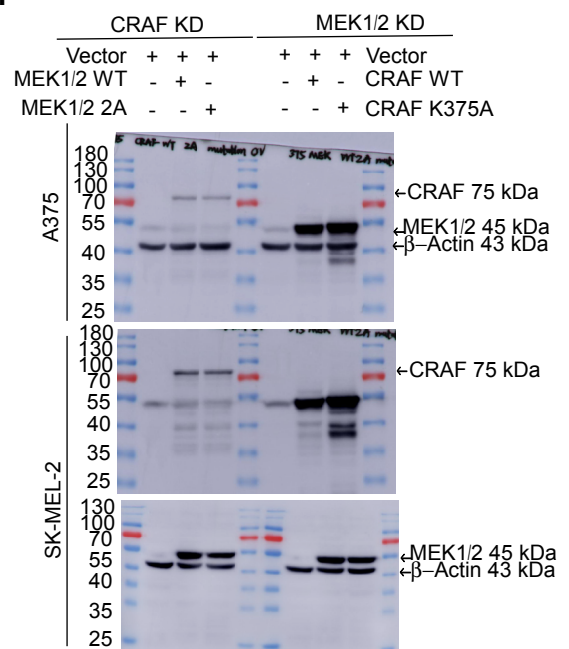



**Supplementary Figure 5c**

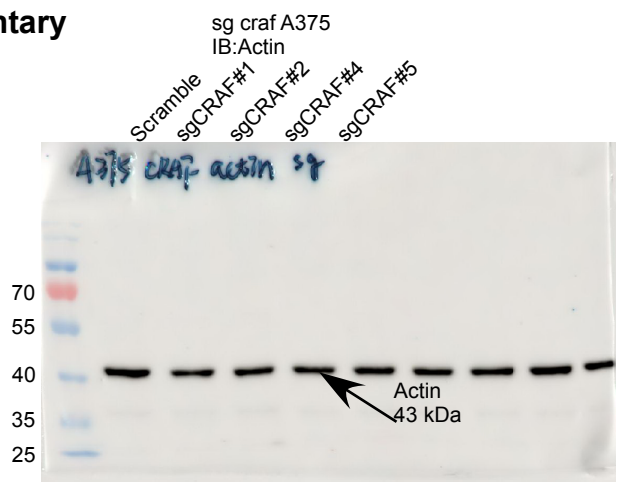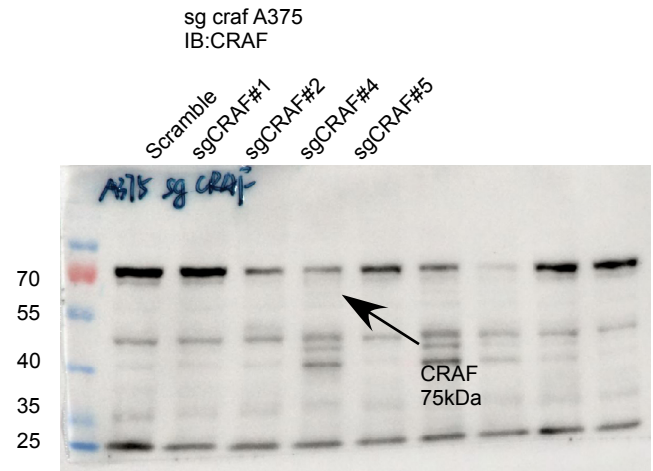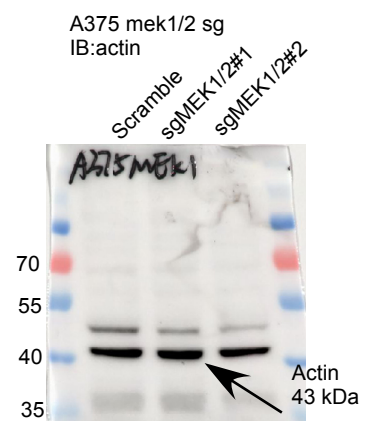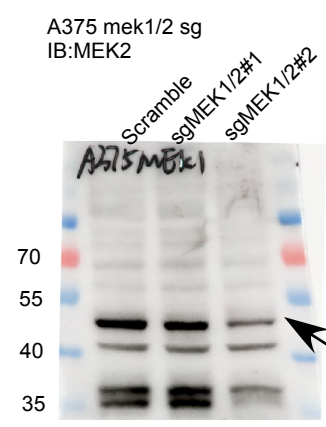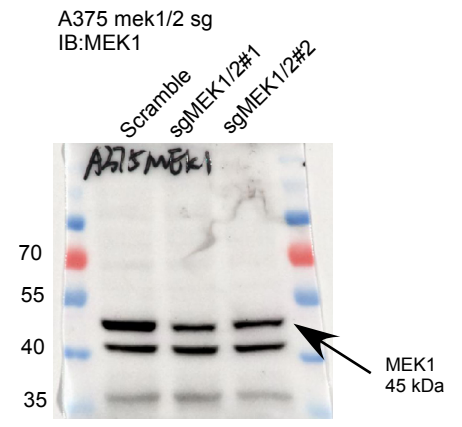

**Supplementary Figure 5d**

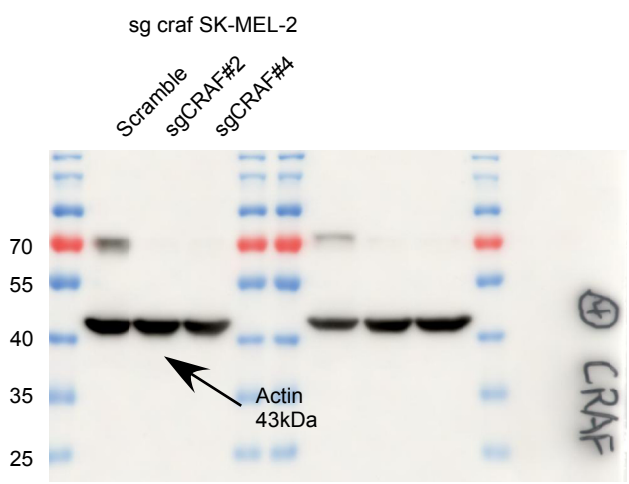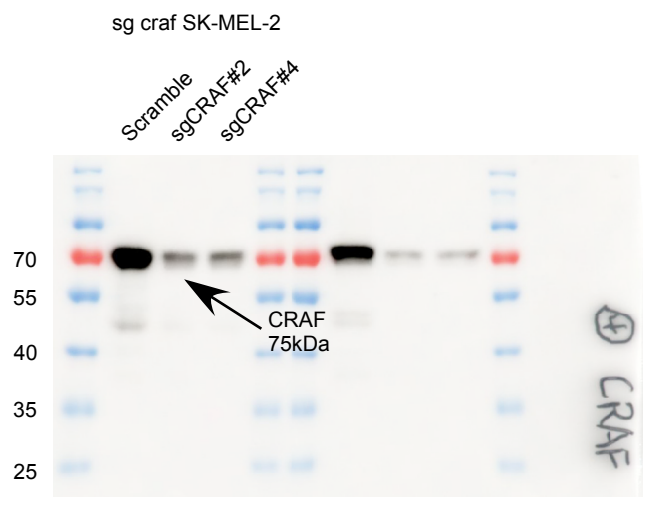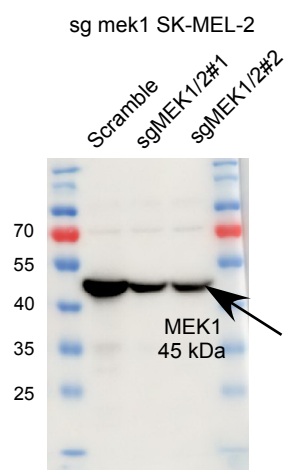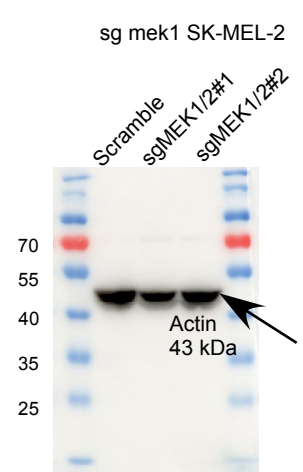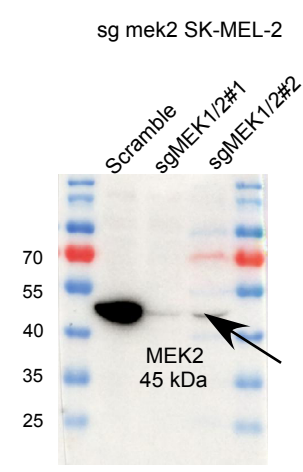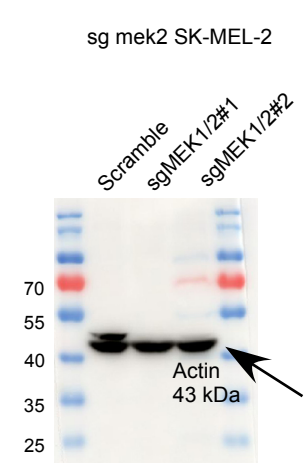

**Figure 5d-left**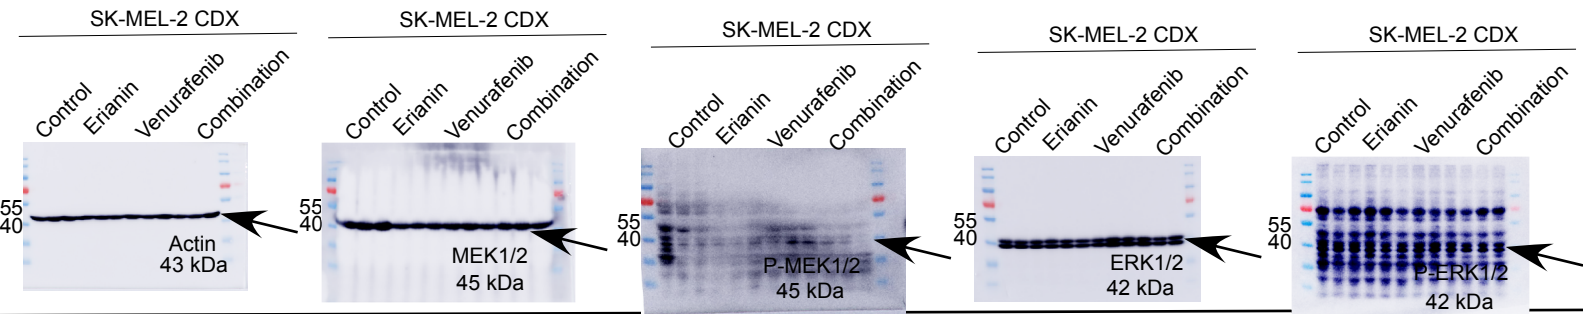**Figure 5d-middle**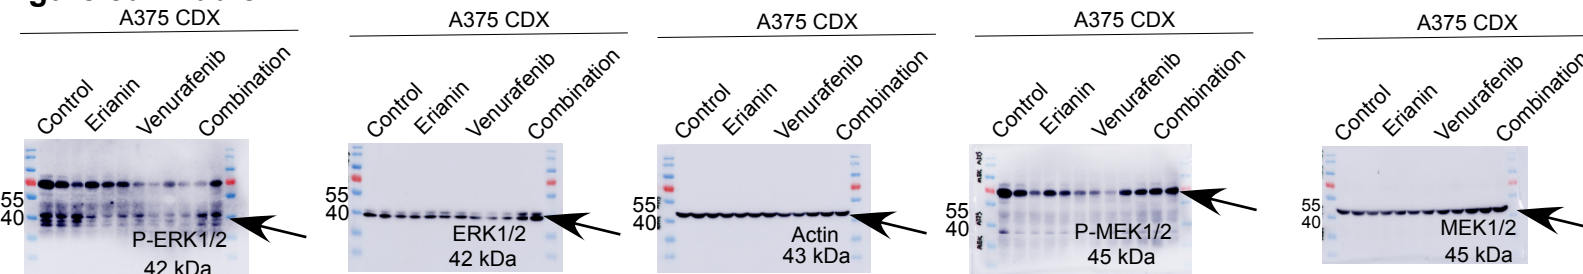**Figure 5d-right**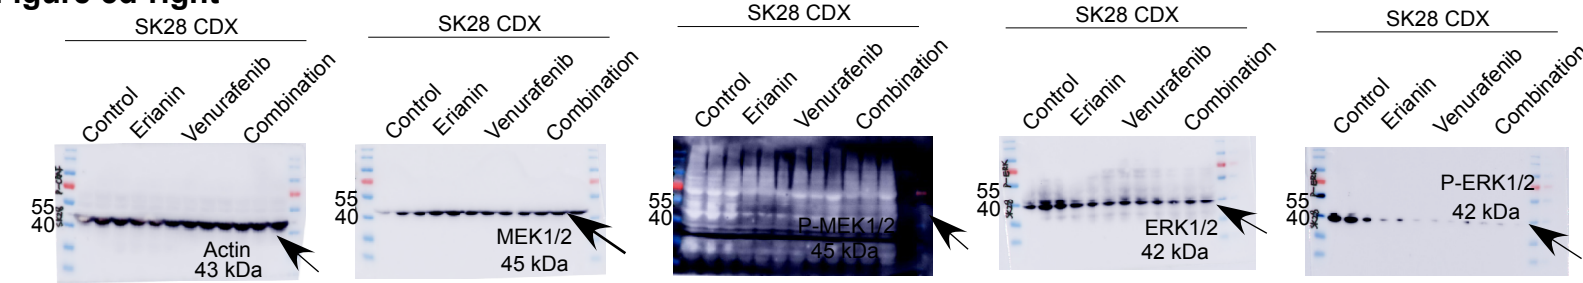**Supplementary Fig S6b**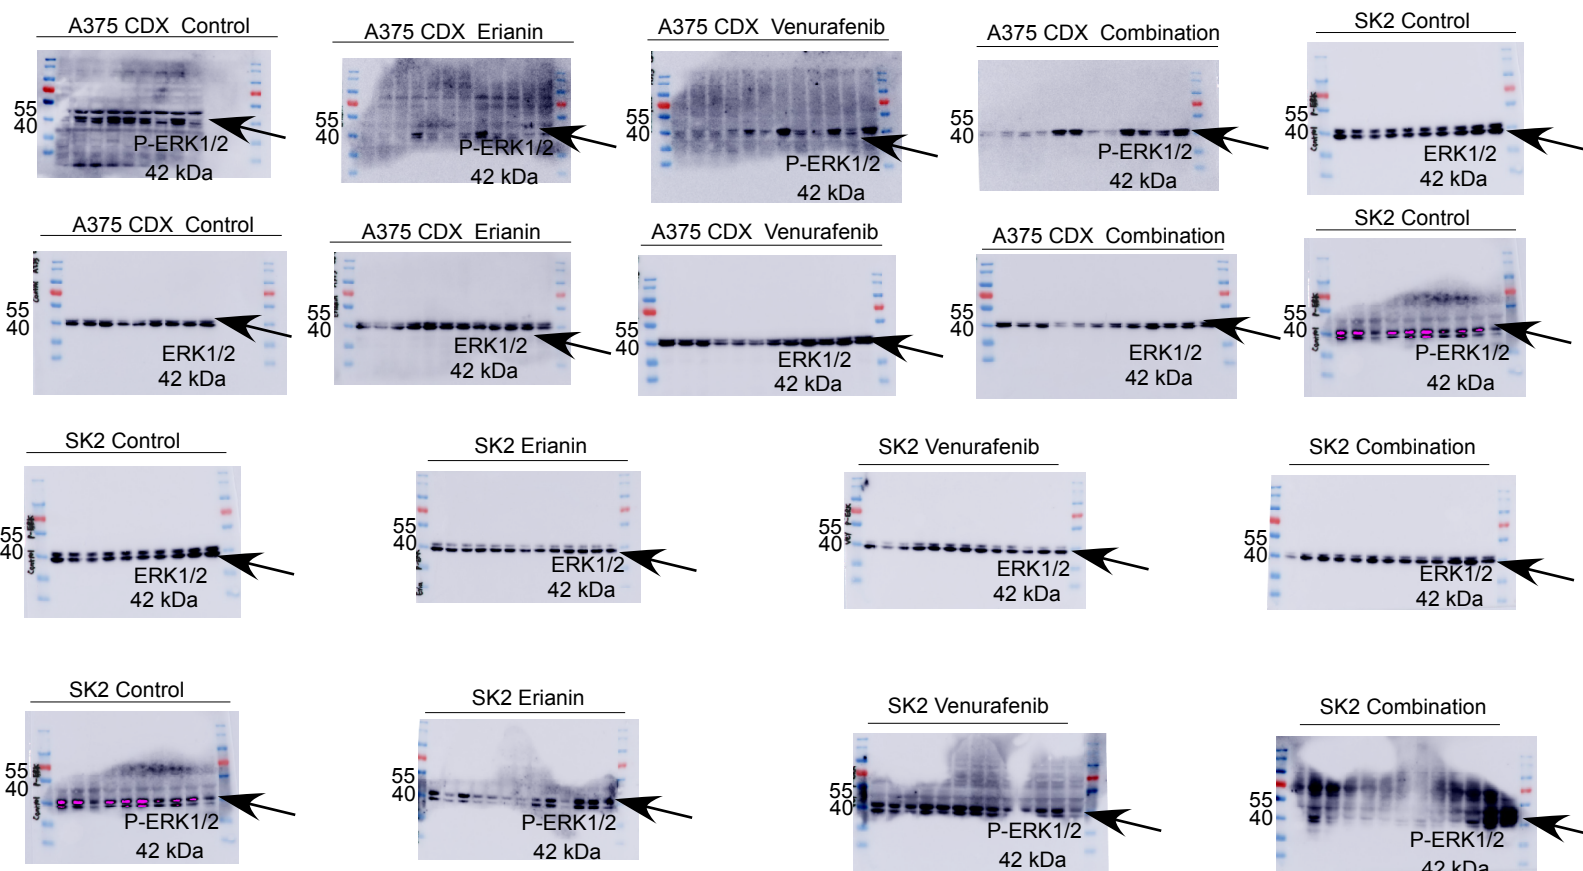

**Figure 6a**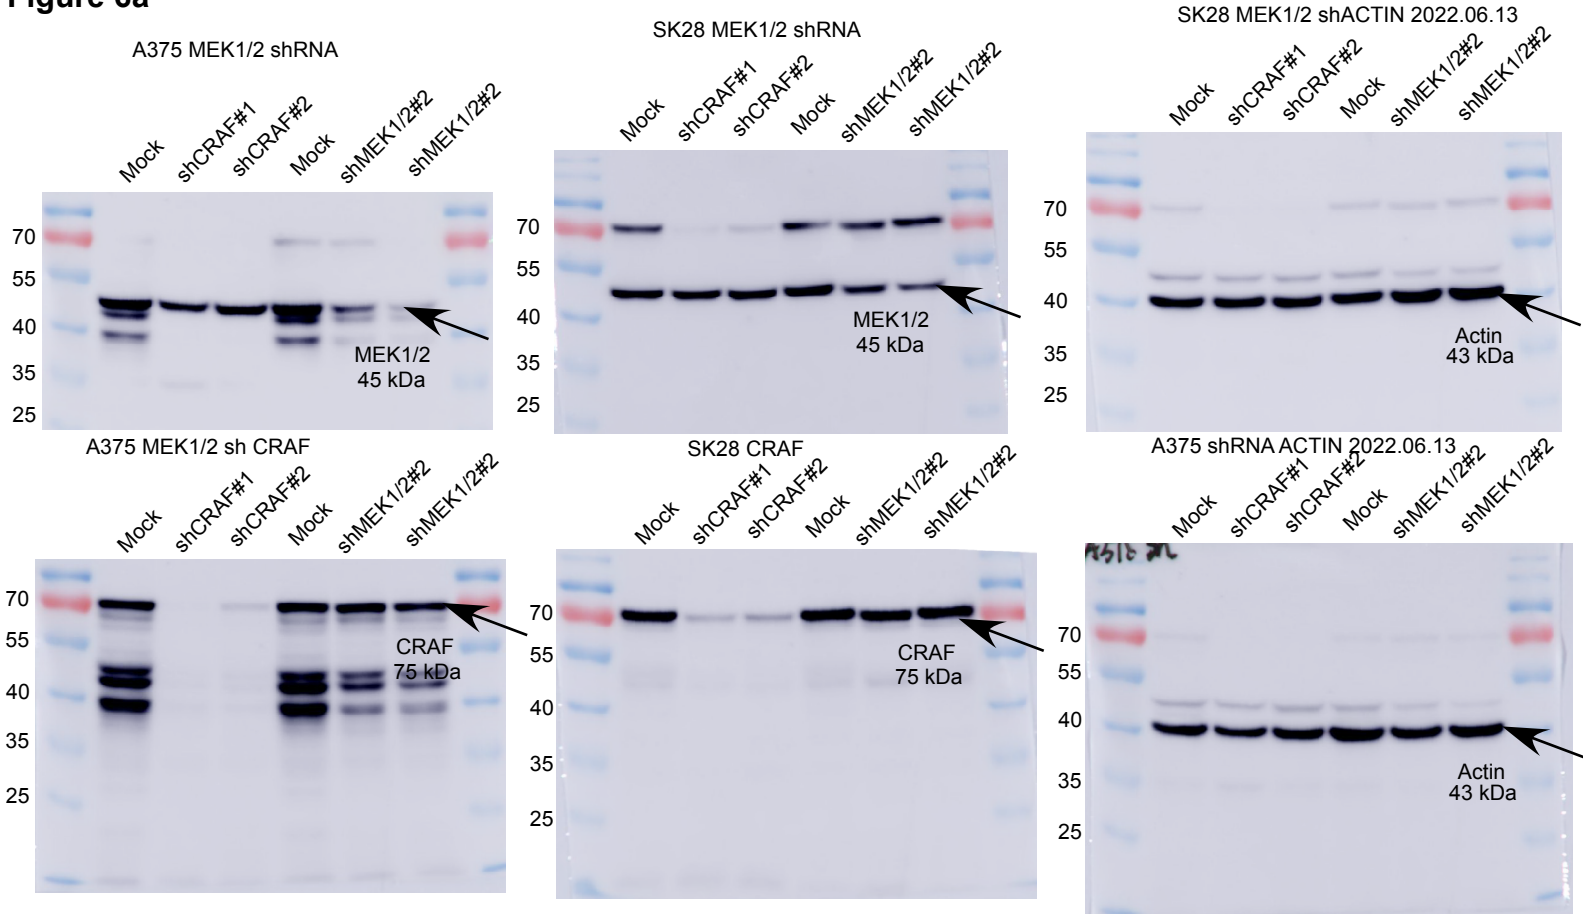**Figure 6b**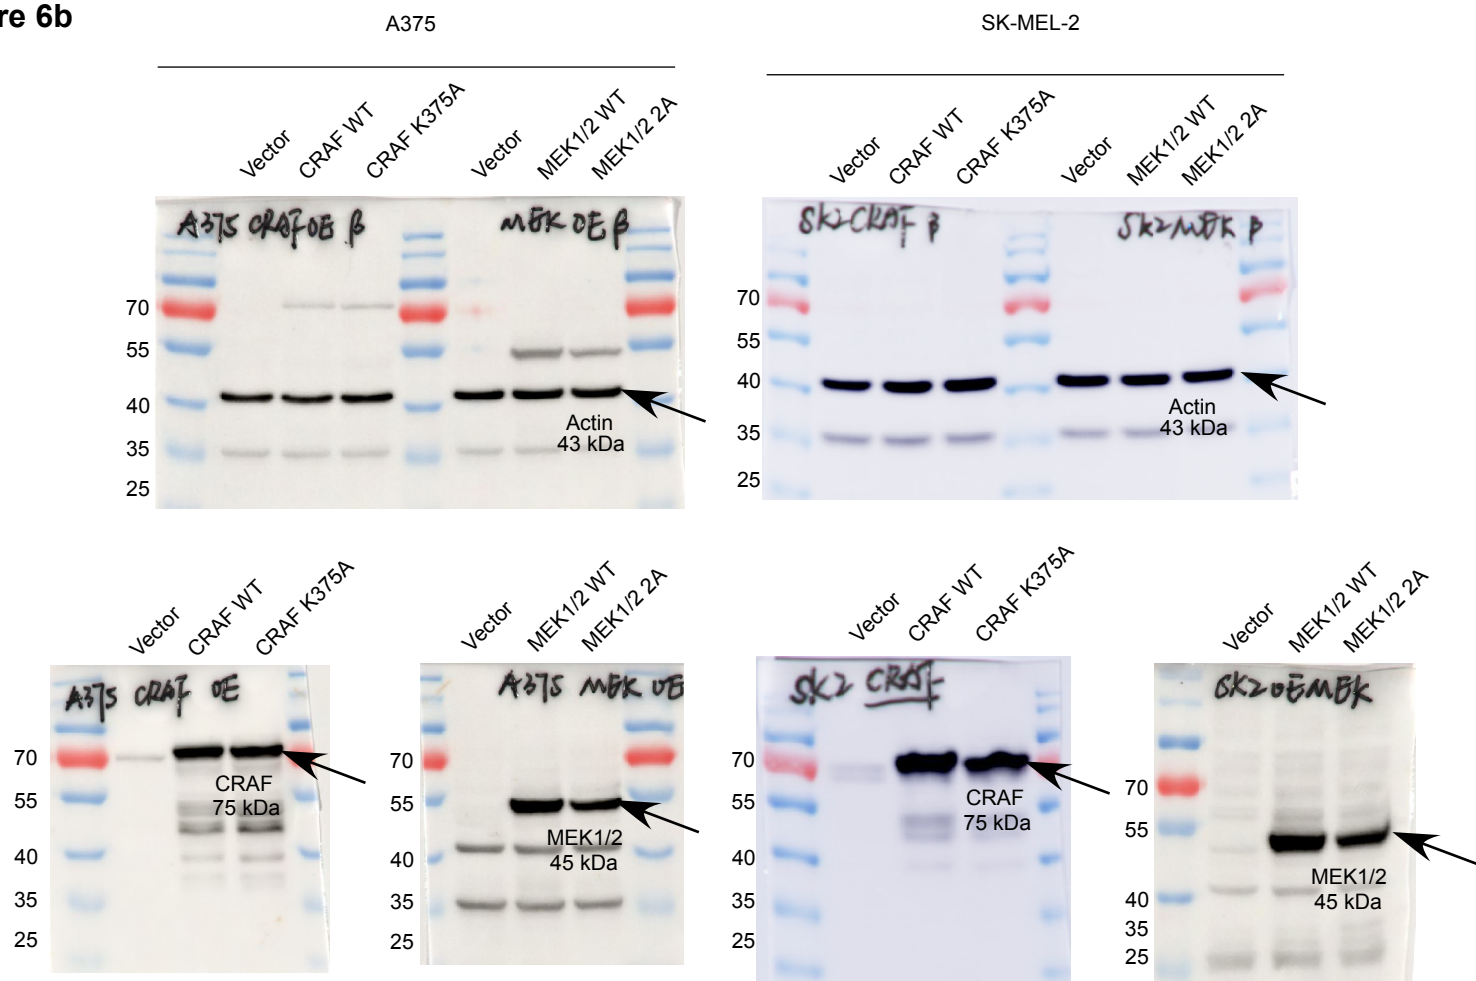

Supplementary Fig. 7b

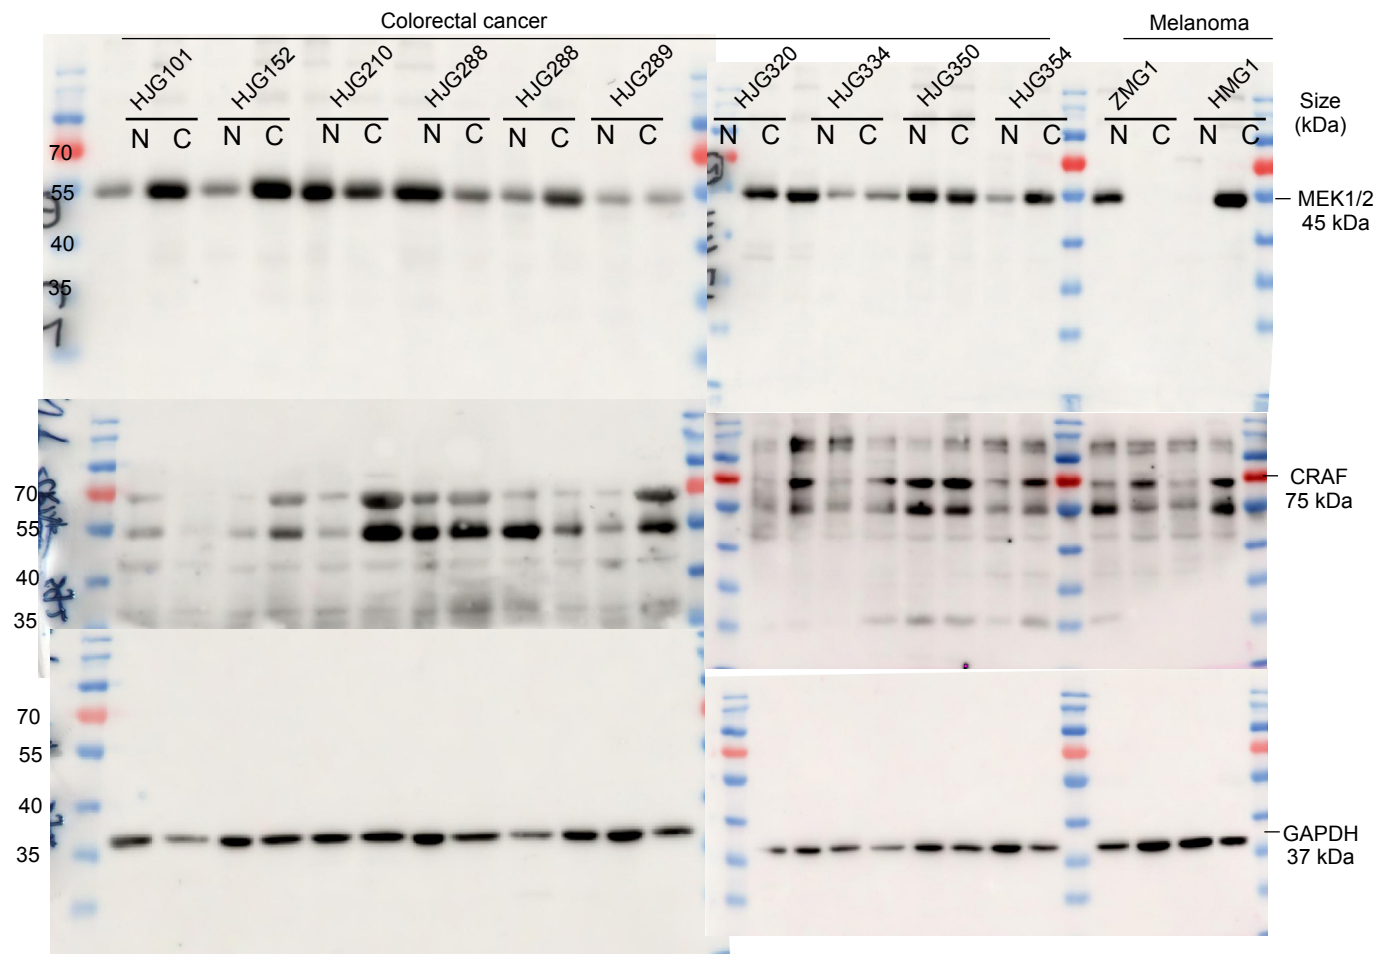

## Supplementary Figure 8c

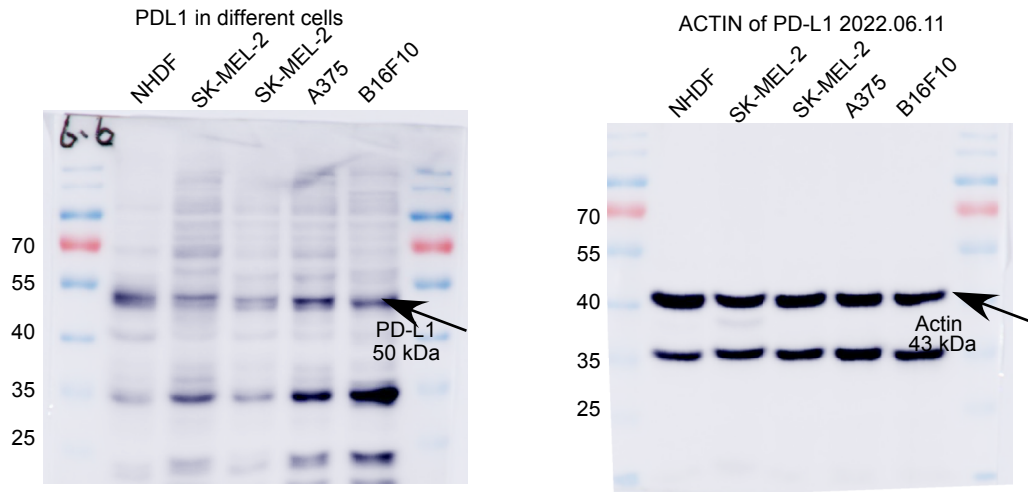

## Supplementary Figure 8d

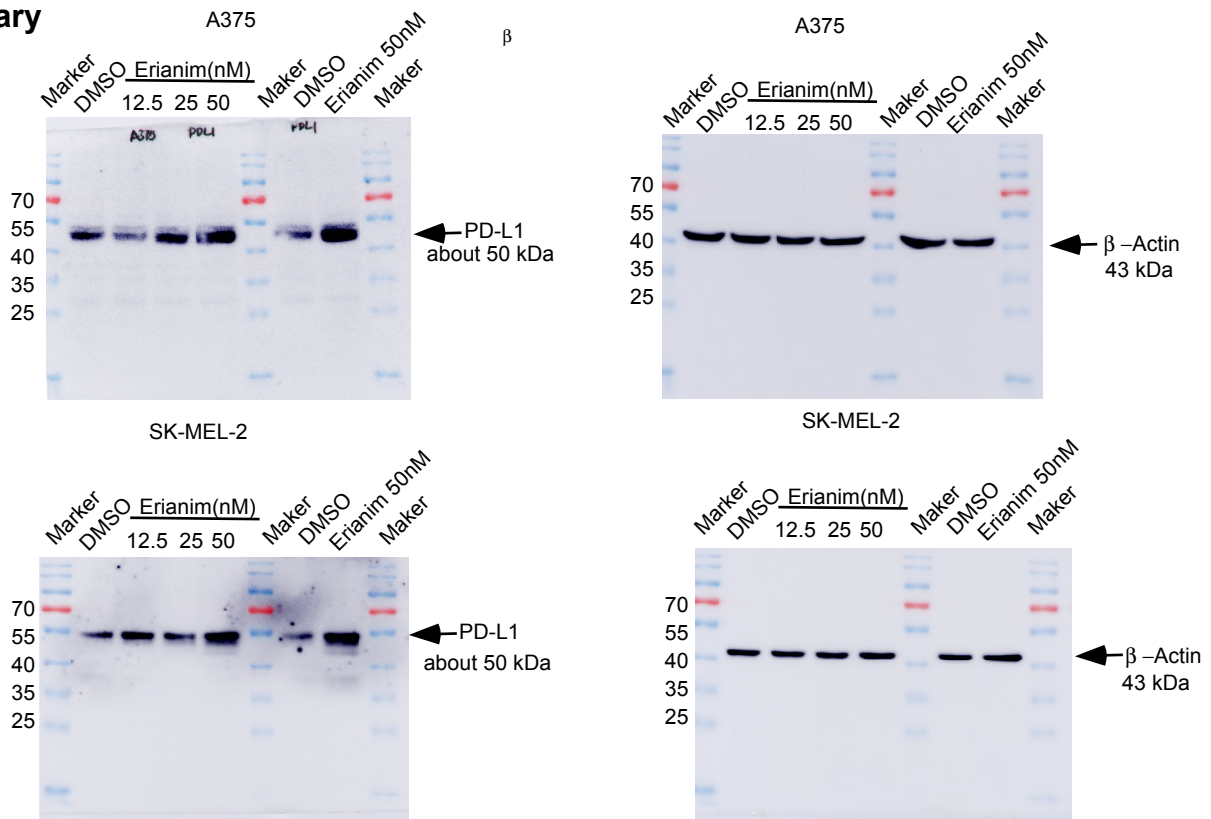

## Supplementary Figure 8f

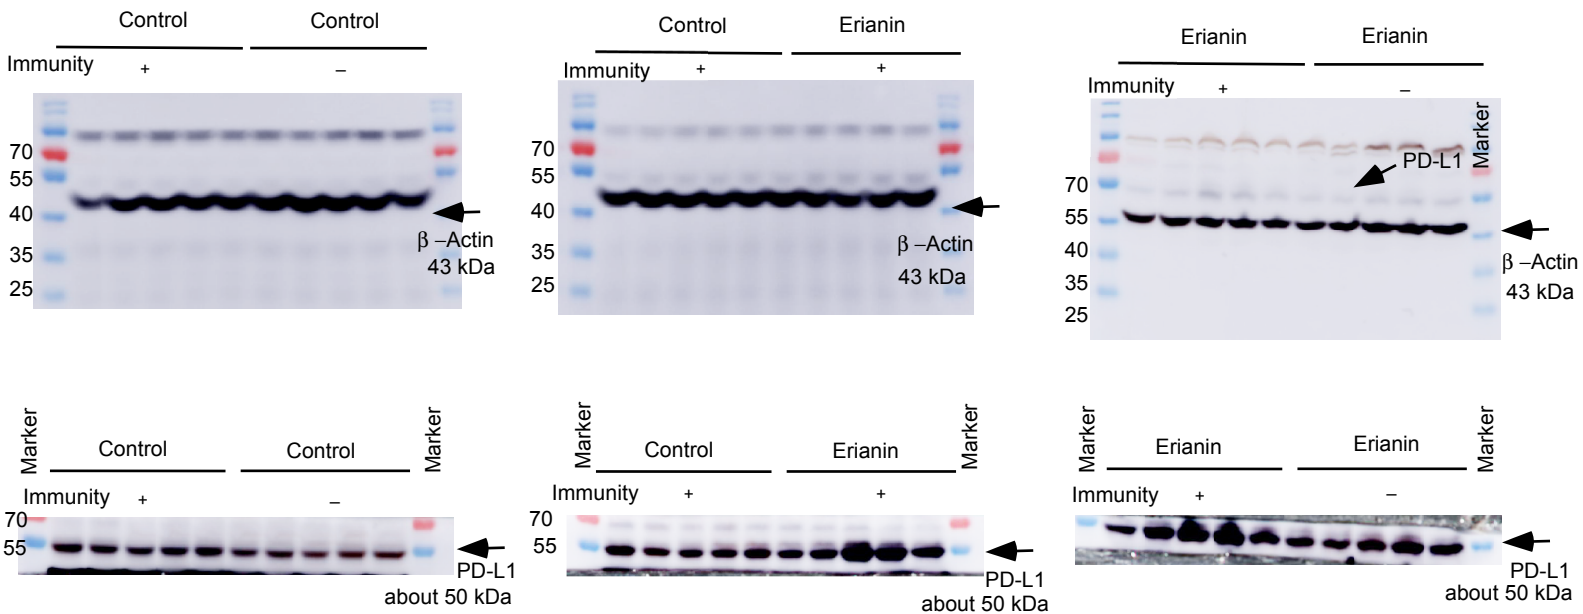

Supplement: 41392_2023_1329_MOESM4_ESM.pdf [file 41392_2023_1329_MOESM4_ESM.pdf]
